# Supplementary material
Source: Springer Nature journal article supplement (https://www.springerprofessional.de/resource/supplementary/13688_2012_3_MOESM3_ESM.pdf/11893960)

## English

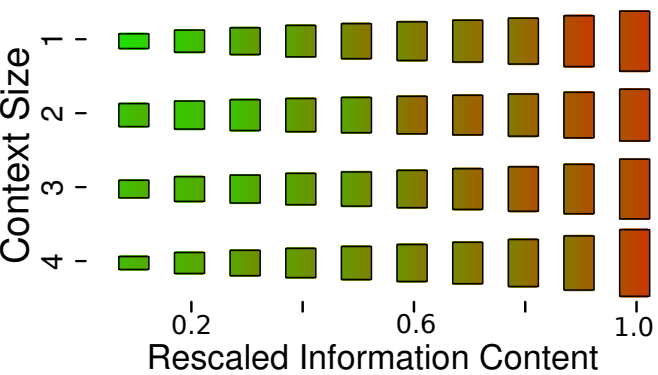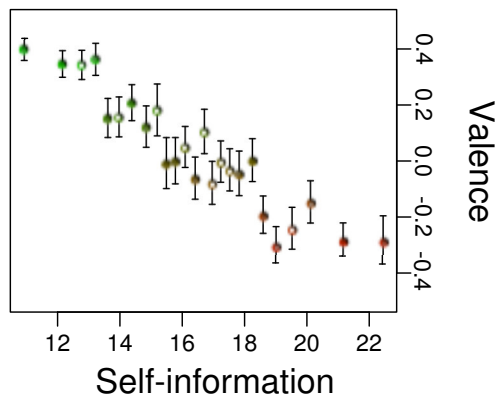

## German

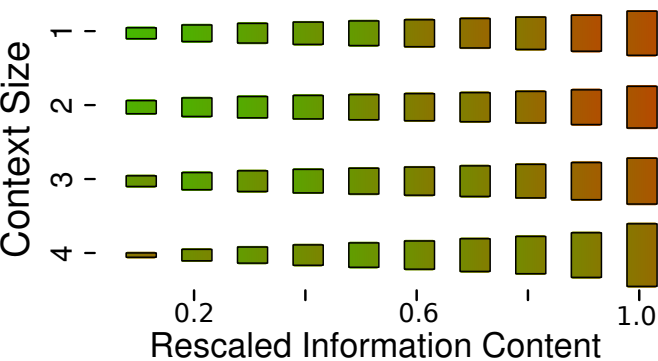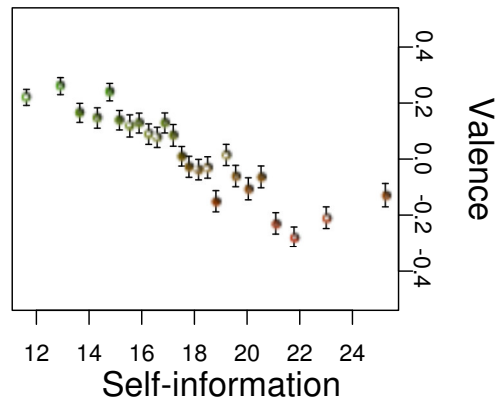

## Spanish

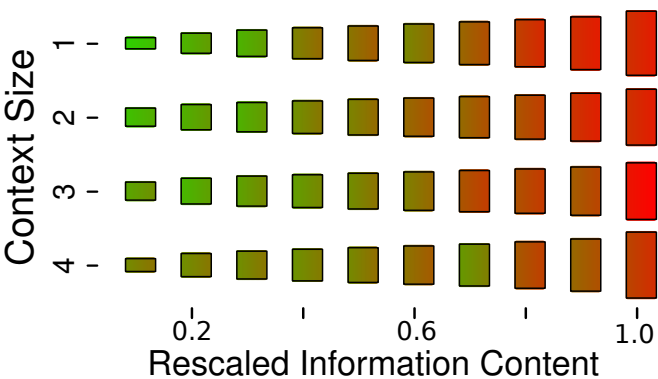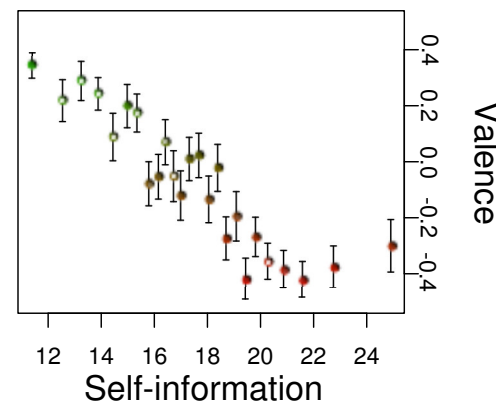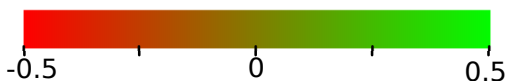

Supplement: MOESM3 [file 11893960]
